# Supplementary material
Source: PubMed Central journal article supplement (PMC6351203)
Supplement: NIHMS993663-supplement-Supp_info.pdf [file NIHMS993663-supplement-Supp_info.pdf]

## Supplementary Information

### **Heteroresistance to the model antimicrobial peptide polymyxin B in the emerging *Neisseria meningitidis* lineage11.2 urethritis clade: mutations in the *pilMNOPQ* operon**

Yih-Ling Tzeng<sup>a</sup>, Evelyn Toh<sup>c</sup>, Zachary Berman<sup>a</sup>, Jose A. Bazan<sup>d, e</sup>, Abigail Norris Turner<sup>d</sup>, Adam C. Retchless<sup>f</sup>, Xin Wang<sup>f</sup>, David E. Nelson<sup>c</sup>, David S. Stephens<sup>a, b, 1</sup>

**Supplemental table S1.** Polymyxin B E-test results

**Supplemental table S2.** Comparison of antibiotic resistance levels of the PmB heteroresistant mutant by disc diffusion

**Supplemental table S3.** Sequences of primers used in this study

**Supplemental figure 1.** Polymyxin B E-test results of *N. meningitidis* isolates and mutants

**Supplemental Table S1.** Polymyxin B E-test results

| Name  | ID            | E Test, PmB<br>( $\mu\text{g/ml}$ ) | Note                  |
|-------|---------------|-------------------------------------|-----------------------|
| CNM1  | COL-201501-07 | 192                                 | US_NmUC               |
| CNM2  | COL-201501-15 | 192                                 | US_NmUC               |
| CNM3  | COL-201501-27 | 256                                 | US_NmUC               |
| CNM4  | COL-201501-29 | 192                                 | US_NmUC               |
| CNM5  | COL-201502-20 | 128                                 | US_NmUC               |
| CNM6  | COL-201503-05 | 192                                 | US_NmUC               |
| CNM7  | COL-201503-27 | 96                                  | US_NmUC               |
| CNM8  | COL-201504-01 | 256                                 | US_NmUC               |
| CNM9  | COL-201504-04 | 128                                 | US_NmUC               |
| CNM10 | COL-201504-11 | 128                                 | US_NmUC               |
| CNM11 | COL-201504-14 | 192                                 | US_NmUC               |
| CNM12 | COL-201504-15 | 192                                 | US_NmUC               |
| CNM13 | COL-201504-18 | 128                                 | US_NmUC               |
| CNM14 | COL-201504-20 | 192                                 | US_NmUC               |
| CNM15 | COL-201504-22 | 192                                 | US_NmUC               |
| CNM16 | COL-201505-02 | 192                                 | US_NmUC               |
| CNM17 | COL-201505-03 | 192                                 | US_NmUC               |
| CNM18 | COL-201505-05 | 192                                 | US_NmUC               |
| CNM19 | COL-201505-12 | 192                                 | US_NmUC               |
| CNG20 | COL-201505-15 | 48                                  | <i>N. gonorrhoeae</i> |
| CNM21 | COL-201505-17 | 192                                 | US_NmUC               |
| CNM22 | COL-201505-21 | 192                                 | US_NmUC               |
| CNM23 | COL-201505-25 | 128                                 | US_NmUC               |
| CNM24 | COL-201505-28 | 96                                  | US_NmUC               |
| CNM25 | COL-201505-29 | 128                                 | US_NmUC               |
| CNM26 | COL-201505-31 | 192                                 | US_NmUC               |
| CNM27 | COL-201505-34 | 192                                 | US_NmUC               |
| CNM28 | COL-201506-02 | 128                                 | US_NmUC               |
| CNM29 | COL-201506-03 | 128                                 | US_NmUC               |
| CNM30 | COL-201506-04 | 96                                  | US_NmUC               |
| CNM32 | COL-201506-27 | 128                                 | US_NmUC               |
| CNM33 | COL-201506-31 | 96                                  | US_NmUC               |
| CNM34 | COL-201507-10 | 16                                  | US_NmUC               |
| CNM35 | COL-201507-26 | 192                                 | US_NmUC               |
| CNM36 | COL-201507-33 | 192                                 | US_NmUC               |
| CNM37 | COL-201507-37 | 96                                  | US_NmUC               |
| CNM38 | COL-201508-02 | 128                                 | US_NmUC               |
| CNM39 | COL-201508-07 | 96                                  | US_NmUC               |

|        |               |     |                        |
|--------|---------------|-----|------------------------|
| CNM40  | COL-201508-16 | 128 | US_NmUC                |
| CNM41  | COL-201508-17 | 192 | US_NmUC                |
| CNM42  | COL-201508-18 | 128 | US_NmUC                |
| CNM43  | COL-201508-19 | 128 | US_NmUC                |
| CNM44  | COL-201508-20 | 128 | US_NmUC                |
| CNM45  | COL-201508-26 | 192 | US_NmUC                |
| CNM46  | COL-201508-31 | 96  | US_NmUC                |
| CNM47  | COL-201508-41 | 128 | US_NmUC                |
| CNM48  | COL-201508-49 | 64  | US_NmUC                |
| CNM49  | COL-201509-03 | 96  | US_NmUC                |
| CNM50  | COL-201509-11 | 128 | US_NmUC                |
| CNM51  | COL-201509-13 | 192 | US_NmUC                |
| CNM52  | COL-201509-23 | 64  | US_NmUC                |
| CNM53  | COL-201509-25 | 128 | US_NmUC                |
| CNM54  | COL-201509-28 | 128 | US_NmUC                |
| ATL#1  |               | 96  | US_NmUC                |
| ATL#2  |               | 128 | US_NmUC                |
| FA19   |               | 48  | <i>N. gonorrhoeae</i>  |
| FA1090 |               | 96  | <i>N. gonorrhoeae</i>  |
| H041   |               | 192 | <i>N. gonorrhoeae</i>  |
| MS11   |               | 96  | <i>N. gonorrhoeae</i>  |
| M7     |               | 64  | <i>N. meningitidis</i> |
| FAM18  |               | 384 | <i>N. meningitidis</i> |
| F-M7   |               | 192 | <i>N. meningitidis</i> |

**Supplemental Table S2.** Comparison of antibiotic resistance levels of the PmB heteroresistant mutant by disc diffusion

| Antibiotics                | CNM3              | 3R4               | MS11 | CNG20 | FA19 |
|----------------------------|-------------------|-------------------|------|-------|------|
| <b>Disc diffusion (mm)</b> |                   |                   |      |       |      |
| Penicillin G               | <b>32.7 ± 1.3</b> | <b>26.9 ± 0.9</b> | 30   | 40    | 45   |
| Cefuroxime                 | <b>31.7 ± 0.6</b> | <b>26.3 ± 0.6</b> | 32   | 42    | 50   |
| Ceftriaxone                | 41.6 ± 3.4        | 39.6 ± 2.7        | 47   | 50    | 58   |
| Streptomycin               | <b>11.6 ± 1.3</b> | <b>9.6 ± 0.5</b>  | 6    | 19    | 16   |
| Kanamycin                  | <b>15.5 ± 1.0</b> | <b>12.4 ± 0.8</b> | 16   | 15    | 18   |
| Chloramphenicol            | <b>35.5 ± 1.2</b> | <b>30.7 ± 1.1</b> | 28   | 41    | 45   |
| Tetracycline               | <b>34.0 ± 0.0</b> | <b>30.7 ± 1.2</b> | 31   | 30    | 38   |
| Ciprofloxacin              | 43.0 ± 1.0        | 43.0 ± 1.0        | 46   | 48    | 54   |

#. Data are presented as the mean ± standard deviation (N=3-8). The values in bold are statistically different between CNM3 and 3R4 by student's t test. A single data point was shown for each gonococcal strain for comparison.

**Supplemental Table S3.** Sequences of primers used in this study

| <b>Primer name</b> | <b>Sequence (5'-3')</b>                      |
|--------------------|----------------------------------------------|
| mtrC-F1            | TTATGAAGCAGGTCTGGAAAGCG                      |
| mtrDF2-ER          | cggaattcCGAATTGGGCGGCGGTTACA                 |
| mtrE3R1-ER         | cggaattcGTTTTCGGCGCGGTCAGTT                  |
| lgtG1              | GCAACCAACAACCTCAAACACG                       |
| lgtG2              | CGTTCATGACCTCTGTACATGC                       |
| pilQ-F1            | CGATATGCGCCAACAAGGGAACA                      |
| pilQ-5RA3          | ttcctcctagttagtcaccccAAACATATGCCCTTATTTGACGC |
| pilQ-3FA3          | cctggaggaataatgaccCATATGCCCTTCTTTATGCTTTTT   |
| pilQ-3R2           | GGGTTCGGGCTTGTCGGGTTAC                       |
| YT113              | TCCCATCCGCCGAATAAATAGTC                      |
| pilM-5Ra           | ttcctcctagttagtcaccccCGGGACGGACGCGATGATGT    |
| pilM-3Fa           | cctggaggaataatgaccGAACTTGATGCGCCGACACTG      |
| pilM-R2            | CTGCCGCTGAGCCGATAAAGAGT                      |
| pilM-3R            | GCCGCCTTACGATGGGTTGT                         |
| aphA3-SmF          | GGGTGACTAACTAGGAGGAA                         |
| aphA3-SmR          | GGGTCATTATTCCTCCAGG                          |
| mutL.1a            | TATGCCACGCATTGCCGCCCTGCC                     |
| mutL.1b            | CGGTTTATTGTCCGCGCAAGAACAG                    |

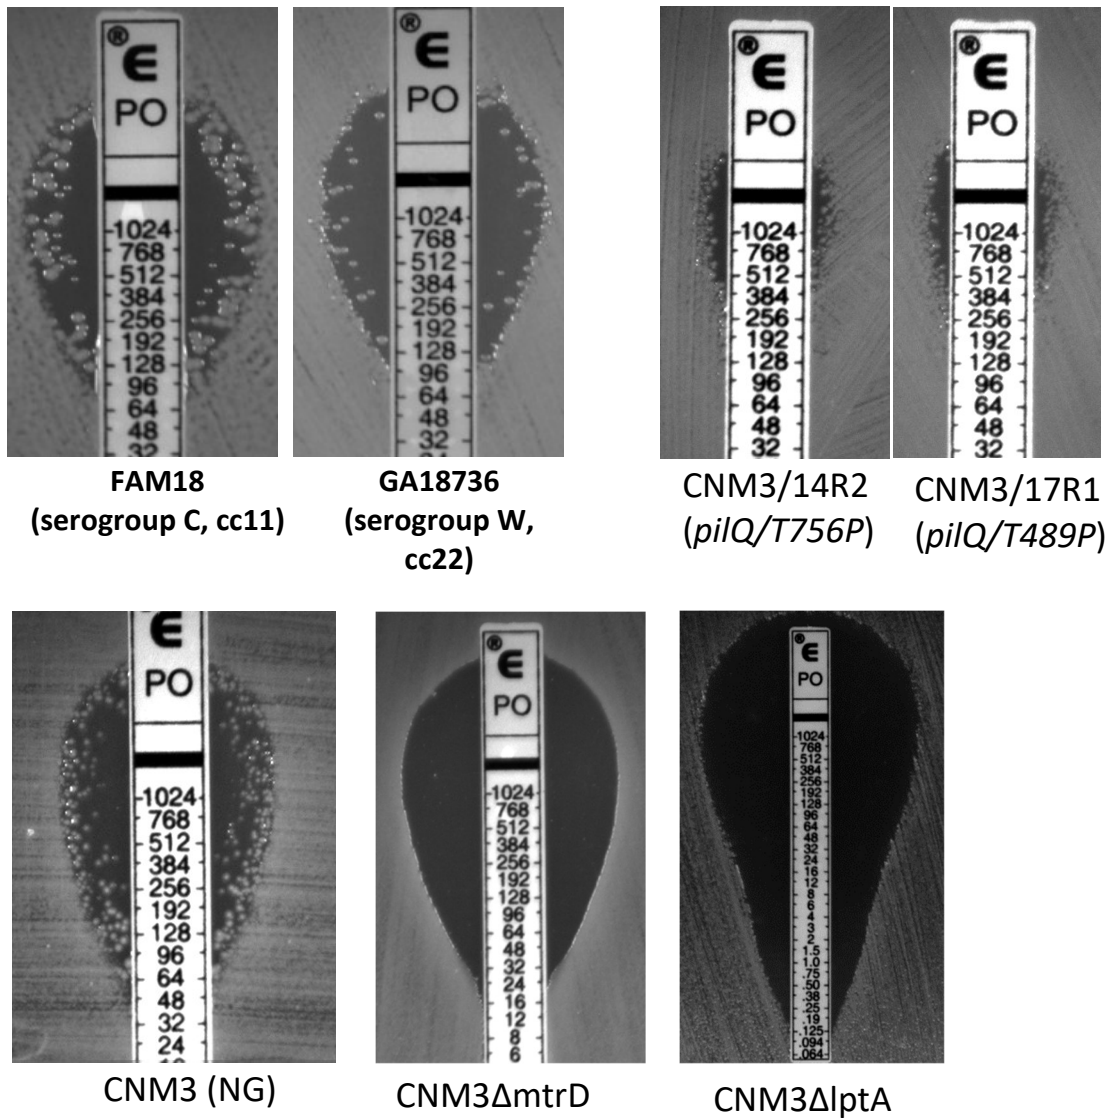

**Supplemental Figure 1.** Polymyxin B E-test results of *N. meningitidis* isolates and mutants
